1 **Financial incentives facilitate the neural computation of prosocial decisions stronger in low**  
2 **empathic individuals**

3 **Iotzov, Vassil<sup>a,b</sup>; Saulin, Anne<sup>a</sup>; Kaiser, Jochen<sup>b</sup>; Han, Shihui<sup>c</sup>;**  
4 **and Hein, Grit<sup>a</sup>**  
5

6 <sup>a</sup>Translational Social Neuroscience Unit, Department of Psychiatry, Psychosomatics, and  
7 Psychotherapy, University of Wuerzburg; <sup>b</sup>Institute of Medical Psychology, Faculty of Medicine,  
8 Goethe University, Frankfurt am Main; <sup>c</sup>School of Psychological and Cognitive Sciences, PKU-  
9 IDG/ McGovern Institute for Brain Research, Peking University, Beijing, 10008, China

10

11

12 **\*corresponding authors:**

13 Vassil Iotzov, Translational Social Neuroscience Lab, Department of Psychiatry, Psychosomatic  
14 and Psychotherapy, University Hospital of Wuerzburg, Margarete-Höppel-Platz 1, 97080  
15 Würzburg / Germany, Tel.: +49 931 201 77 412, E-mail: [Iotzov\\_V@ukw.de](mailto:Iotzov_V@ukw.de)

16 Prof. Dr. Grit Hein, Translational Social Neuroscience Lab, Department of Psychiatry,  
17 Psychosomatic and Psychotherapy, University Hospital of Wuerzburg, Margarete-Höppel-Platz  
18 1, 97080 Würzburg / Germany, Tel.: +49 931 201 77 411, E-mail: [Hein\\_G@ukw.de](mailto:Hein_G@ukw.de)

19

20

21

22 **Abstract**

23 Financial incentives are commonly used to motivate behaviours. There is also evidence  
24 that incentives can decline the behaviour they are supposed to foster, for example, documented  
25 by a decrease in blood donations if a financial incentive is offered. Based on these findings,  
26 previous studies assumed that prosocial motivation is shaped by incentives. However, so far,  
27 there is no direct evidence showing an interaction between financial incentives and a specific  
28 prosocial motive. Combining drift-diffusion modelling and fMRI, we investigated the effect of  
29 financial incentives on empathy, i.e., one of the key motives driving prosocial decisions. In the  
30 empathy-alone condition, participants made prosocial decisions based on empathy, in the  
31 empathy-bonus condition, they were offered a financial bonus for prosocial decisions, in addition  
32 to empathy induction. On average, the bonus enhanced the information accumulation in empathy-  
33 based decision. On the neural level, this enhancement was related to the anterior insula, the same  
34 region that also correlated with empathy ratings. Moreover, the effect of the financial incentive  
35 on anterior insula activation was stronger the lower a person scored on empathy. These findings  
36 show that financial incentives enhance prosocial motivation in the absence of empathy but have  
37 little effect on high empathic individuals.

38

39 **Keywords**

40 empathy, prosocial behaviour, incentives, drift-diffusion modelling, fMRI

41

## 42 **Introduction**

43 Financial incentives are frequently used to motivate people. Such measures are based on  
44 empirical evidence showing that financial incentives increase the frequency of the rewarded  
45 behaviour (Garbers and Konradt, 2014; Wei and Yazdanifard, 2014), including cooperative and  
46 prosocial behaviours (Balliet *et al.*, 2011; Stoop *et al.*, 2018). For example, in a meta-analysis,  
47 Balliet and colleagues found that reward positively affects cooperation (Balliet *et al.*, 2011).  
48 Consequently, financial incentives could increase the motivation to behave prosocially (Ariely *et*  
49 *al.*, 2009). However, there is other evidence that incentives can undermine the very behaviour  
50 they are meant to strengthen (Titmuss, 1970; Deci *et al.*, 1999; Benabou and Tirole, 2006;  
51 Murayama *et al.*, 2010; Niza *et al.*, 2013; Rode *et al.*, 2015; Besley and Ghatak, 2018). The most  
52 classic example in the realm of prosocial behaviours is the observation that people donate less  
53 blood if they are paid to do so, compared to the amount of blood that they donate without  
54 payment, i.e., to help others (Titmuss, 1970; Niza *et al.*, 2013). In line with these observations,  
55 other studies have shown that adding financial incentives can reduce prosocial behaviours  
56 (Bowles, 2008; Ariely *et al.*, 2009; Holmås *et al.*, 2010). In sum, the evidence regarding the  
57 effects of incentives on prosocial decisions is inconsistent, and mainly based on behavioral  
58 observations that do not provide insights in the underlying motivational processes. As a result, it  
59 remained unclear whether and how financial incentives interact with a specific prosocial motive.

60 Overcoming this limitation, our study directly investigated how a financial incentive  
61 shapes prosocial decisions that are driven by a specific prosocial motive, i.e., empathy.  
62 Incorporating previous approaches, we used a well-established decisions task (i.e., a modified  
63 version of a binary dictator game (Hein *et al.*, 2016b)). Extending previous studies, we activated  
64 a specific prosocial motive (empathy) before participants entered the decision task, and, in one  
65 condition, added a financial incentive. This allowed us to investigate how financial incentives

66 change the processing of prosocial decisions that are driven by one specific, carefully controlled  
67 motive. To control for other motivations that might play a role besides empathy (self-image  
68 concerns; reciprocity), the incentive was offered in private, the decisions were kept anonymous,  
69 and the participants knew that they would not meet the other players after the study. This measure  
70 is important because it minimizes participants' motivation to maintain a positive public image,  
71 i.e., a different motive that may affect participants' prosocial decisions besides empathy (Benabou  
72 and Tirole, 2006; Ariely *et al.*, 2009; Exley, 2017; Besley and Ghatak, 2018).

73         Empathy is defined as the affective response to another person's misfortune (Batson *et al.*,  
74 1995; Lamm *et al.*, 2011; Decety *et al.*, 2016; Hein *et al.*, 2016b; Marsh, 2018). Neuroscientific  
75 studies have shown that prosocial decisions correlate with brain activations in regions that are  
76 also associated with individual differences in empathy, such as the anterior insula (AI) cortex and  
77 the anterior cingulate cortex (ACC) (Hein *et al.*, 2010; Masten *et al.*, 2011; Hein *et al.*, 2016b;  
78 Marsh, 2018). We chose to induce empathy because it is one of the strongest prosocial motives  
79 (Batson *et al.*, 1995; Decety *et al.*, 2016). Previous work has established a reliable link between  
80 the individual strength of the empathy motive and the propensity to act prosocially, e.g.,  
81 decisions that maximize the outcome of another person at costs to oneself (Batson *et al.*, 1995;  
82 Decety *et al.*, 2016). The stronger the empathy motive, the stronger the propensity to decide in  
83 favour of the other person. Previous social psychology work has investigated how empathy is  
84 shaped by selfish motives, such as the motive to withdraw from a stress-inducing situation  
85 (Batson *et al.*, 1981). However, to the best of our knowledge, there are no previous studies that  
86 tested how financial incentives affect the components of empathy-based prosocial decisions.

87         The study consisted of two parts (**Fig. 1**). In part 1, the empathy motive was activated  
88 towards one partner (a confederate). In the following allocation task, participants allocated points  
89 to the respective partner (here driven by empathy; empathy-alone condition). Next, the

90 confederate was replaced by a new individual that served as a partner for part 2. In part 2, the  
91 empathy motive was activated again. However, before starting the decision task, the participant  
92 was told that she would receive a bonus if she decided prosocially in the majority of the decision  
93 trials. In the following allocation task, participants again allocated points to the respective partner  
94 (here driven by empathy and the financial incentive; empathy-bonus condition). The order of the  
95 two conditions (empathy-alone and empathy-bonus) was counterbalanced across participants and  
96 the two confederates.

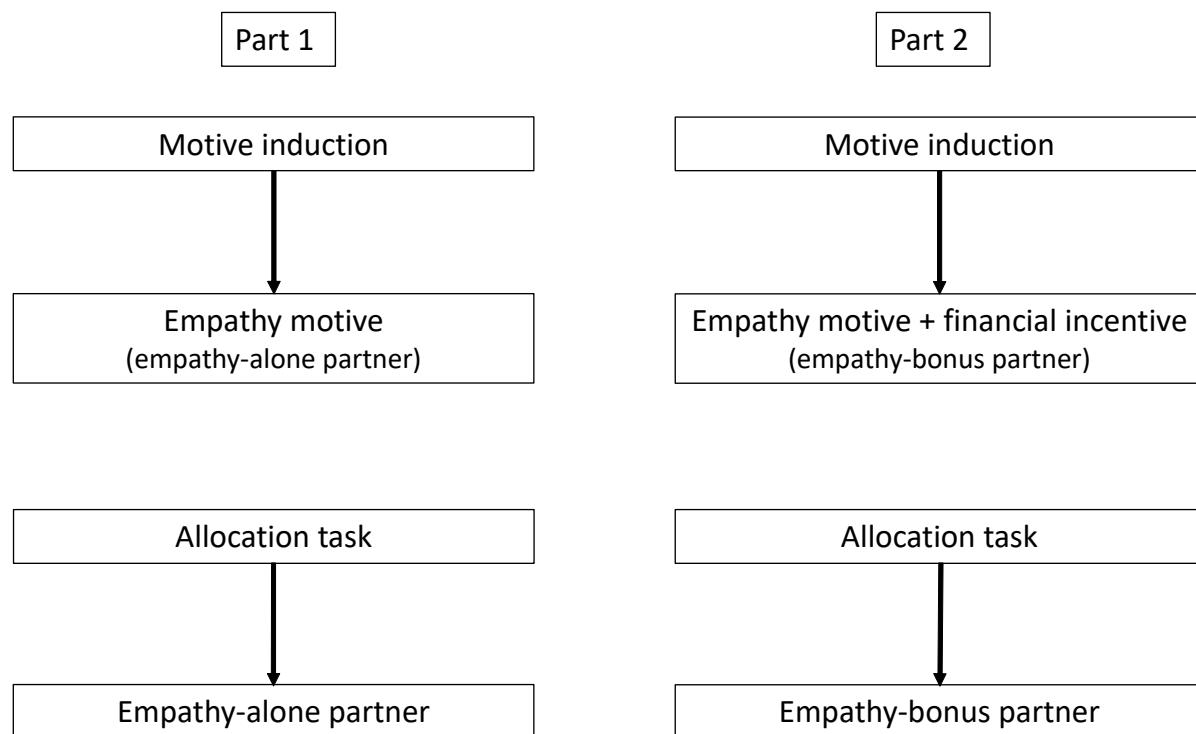

97  
98 **Fig. 1** Overview of an exemplary experimental procedure. The study consisted of two parts. In this example, in part  
99 1, the empathy motive was activated towards one confederate (the empathy-alone partner). In the following  
100 allocation task, participants allocated points to the empathy partner (i.e., driven by the empathy motive). Next, the  
101 confederate was replaced by a new individual that served as partner for part 2. Again, the empathy motive was  
102 activated. After the empathy motive induction additionally a bonus for choosing the prosocial option in the majority  
103 of trials in the subsequent allocation task was offered (empathy-bonus partner). Thus, in the following allocation  
104 task, participants allocated points towards the empathy-bonus partner (i.e., driven by the empathy motive and the  
105 additionally offered bonus). The order of motive induction (empathy-alone, empathy-bonus) was counterbalanced  
106 across participants and both confederates. The respective partner was indicated by a cue in one of two  
107 counterbalanced colors.

108

109           To induce empathy, participants repeatedly observed two interaction partners receiving  
110 painful shocks in a number of trials, a situation known to elicit an empathic response (Lamm *et*  
111 *al.*, 2011; Hein *et al.*, 2016a; Hein *et al.*, 2016b). As a measure of the individual strength of the  
112 induced empathy motive, participants rated how they felt when observing the respective other  
113 person in pain (**Fig. 2A**). To allow participants to simulate the state (pain) of the other person, in  
114 some trials, participants received painful stimulation themselves.

115           During the allocation task inside the fMRI scanner, participants allocated points to the  
116 partners at a cost to themselves (**Fig. 2B**). The allocation of points towards the one partner  
117 (empathy partner) should be based on the previously activated empathy motive (empathy-alone  
118 condition). The allocation of points towards the other partner (empathy-bonus partner) was also  
119 based on the previously activated empathy motive. However, in this condition, participants were  
120 additionally informed that they would receive a bonus for choosing the prosocial option in the  
121 majority of trials in the subsequent allocation task (empathy-bonus condition). Note that the  
122 bonus corresponded to the maximally possible outcome in the allocation task (i.e., the outcome  
123 that a participant would gain if she always chose the selfish option). Thus, deciding prosocially to  
124 reach the bonus criterion in the empathy-bonus condition did not result in a financial loss for the  
125 participants.

126

127

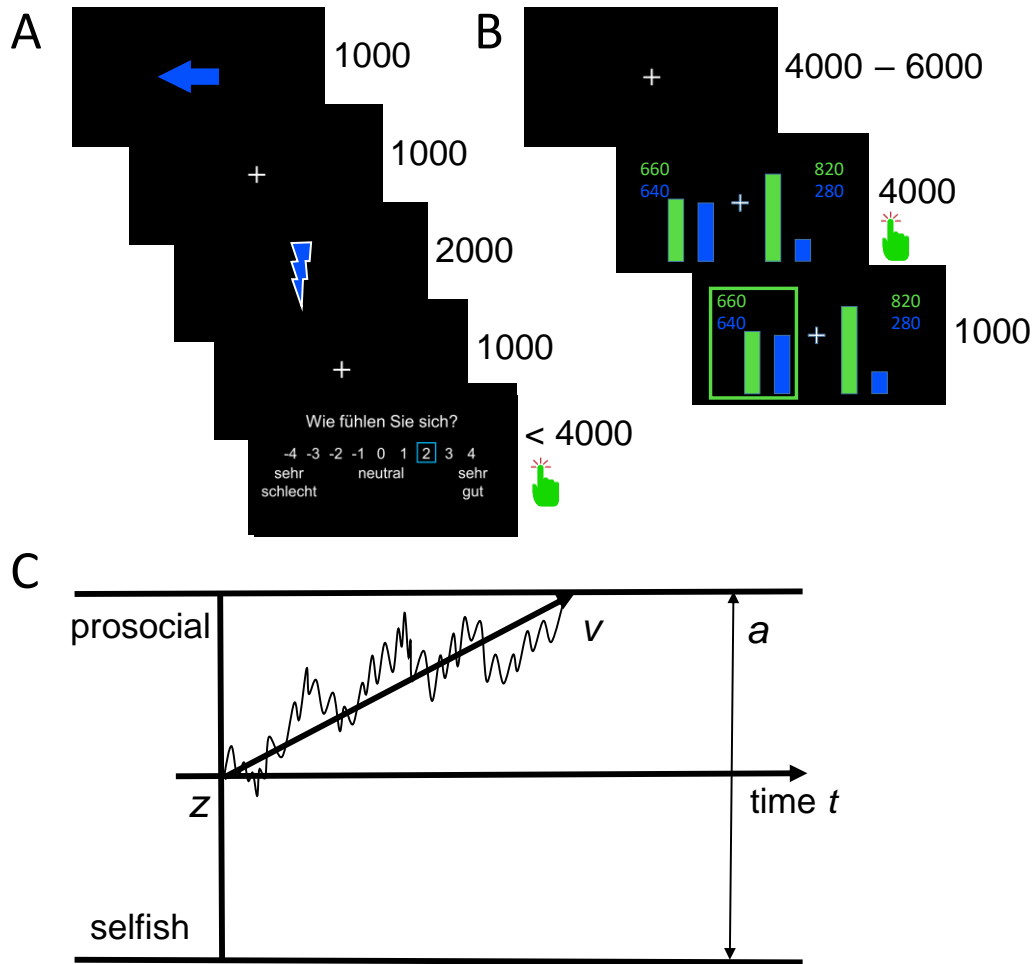

128

129 **Fig. 2.** Examples of induction and decision trials and schematic overview of the drift-diffusion model (DDM). **A)**  
 130 Example trial of the empathy induction. The arrow cue indicated the receiver of the stimulation (self, the empathy-  
 131 alone partner in one condition or the empathy-bonus partner in the other condition). The lightning bolt indicated pain  
 132 stimulation. Participants rated how they felt after observing the stimulation of the partner or receiving it themselves  
 133 (-4 = very bad; +4 = very good). **B)** Example trial of the allocation task. Participants chose between a prosocial  
 134 option that maximized points for the partner or a selfish option that maximized points for themselves. In this example  
 135 trial, the participant chose the prosocial option, which maximized the outcome of the partner at a cost to the  
 136 participant (green box). **C)** Schematic overview of the drift-diffusion model. According to the drift-diffusion model,  
 137 the decision process is a noisy accumulation of information (jagged black line). From the distributions of both  
 138 prosocial and selfish decisions, a set of parameters is estimated that allows to draw conclusions about the underlying  
 139 cognitive processes. These are mainly the speed of information accumulation ( $v$ -parameter), the starting point of the  
 140 decision process ( $z$ -parameter), and the amount of information to be processed ( $a$ -parameter). As soon as the  
 141 accumulated information reaches one of the two boundaries, the decision is made (upper boundary = prosocial  
 142 option; lower boundary = selfish option).

143  
 144

145 To specify how incentives modulate empathy-related decisions, we used drift-diffusion  
 146 modelling (DDM). DDMs assumes that during binary decisions, noisy information is  
 147 accumulated to select a decision option mainly based on three different parameters (the  $v$ -,  $z$ - and

148  $a$ -parameters; (Forstmann *et al.*, 2016; Ratcliff *et al.*, 2016); **Fig. 2C**). The  $v$ -parameter describes  
149 the speed of noisy evidence accumulation in order to choose one of two options, i.e., the  
150 efficiency of the decision process itself. Thus, a larger  $v$ -parameter indicates faster information  
151 accumulation regarding the prosocial option. The individual decision bias is reflected by the  $z$ -  
152 parameter. In contrast to the  $v$ -parameter, the  $z$ -parameter models the individual preferences with  
153 which a person starts the decision process. For example, if a person has a strong prior preference  
154 for prosocial decisions, the starting point of the decision process is closer to the prosocial  
155 decision boundary, and therefore less evidence has to be accumulated regarding the prosocial  
156 option. The amount of evidence that needs to be accumulated to distinguish between the two  
157 options is reflected by the  $a$ -parameter. We modelled these three parameters ( $v$ ,  $z$ , and  $a$ ) for  
158 decisions that were driven by the empathy motive alone and that were driven by the combination  
159 of the empathy motive and the financial incentive, based on the raw data from the entire data set  
160 (i.e., including trial-by-trial information of all decisions). Additionally, the non-decision time ( $t_0$ )  
161 was estimated across conditions (see Methods for details).

162         Extending the classical DDM approach, a recent model has proposed that the evidence in  
163 favour of one or another choice alternative might be shaped by affective and motivational states  
164 (Roberts and Hutcherson, 2019). Supporting this assumption, affective states have been found to  
165 change central parameter of the choice process such as the drift rate ( $v$ -parameter; (Lerche *et al.*,  
166 2018; Roberts and Hutcherson, 2019; Aylward *et al.*, 2020; Thompson and Steinbeis, 2021)) and  
167 the starting point ( $z$ -parameter, (White *et al.*, 2018)). Inspired by these results, we assumed that  
168 the evidence in favor of a prosocial choice might be different in different motivational states (i.e.,  
169 induced by empathy and its potential interaction with the incentive), reflected by a changes in the  
170 drift rate and/ or the starting point.



171           One assumption is that financial incentives may enhance empathy-related prosocial  
172 decisions, inspired by findings of reward-related increases of prosociality (Garbers and Konradt,  
173 2014; Wei and Yazdanifard, 2014). If this was true, the frequency and efficiency of prosocial  
174 decisions should be higher in the empathy-bonus compared to the empathy-alone condition.  
175 Specifying the potential effect of the incentive on the prosocial choice process, the DDM  
176 proposes that an incentive-related facilitation of prosocial choices may originate A) from an  
177 increased speed of information accumulation, i.e., an increased drift rate ( $v$ -parameter (Lerche *et*  
178 *al.*, 2018; Roberts and Hutcherson, 2019; Aylward *et al.*, 2020; Thompson and Steinbeis, 2021),  
179 B) an enhancement of participants' initial preference to choose the prosocial option, i.e, a shift of  
180 the starting point towards the prosocial decision boundary ( $z$ -parameter (White *et al.*, 2018)), or  
181 C) from an enhancement of the  $v$ - as well as the  $z$ -parameter in the empathy-bonus compared to  
182 the empathy-alone condition,

183           Alternatively, it is possible that financial incentives undermine empathy-related prosocial  
184 decisions, in line with previous findings that showed an incentive-related decrease in prosocial  
185 behaviour (Titmuss, 1970; Benabou and Tirole, 2006; Murayama *et al.*, 2010; Rode *et al.*, 2015).  
186 In this case, prosocial decisions should be more frequent in the empathy-alone compared to the  
187 empathy-bonus condition. According to the DDM, such an undermining effect may be reflected  
188 A) by a reduced speed of information accumulation ( $v$ -parameter), B) a shift of the starting point  
189 away from the prosocial decision boundary ( $z$ -parameter), or C) a reduction in both parameters in  
190 the empathy-bonus compared to the empathy-alone condition.

191           Finally, it is possible that the effect of financial incentives depends on the strength of the  
192 empathy motive, i.e., might be different for high empathic compared to low empathic individuals.  
193 If this is true, the individual difference between the empathy-bonus vs empathy-alone condition

194 and changes in the drift rate and/or the starting point should be related to the individual empathy  
195 ratings, i.e., the measure that captures the strength of the empathy motive during the first part of  
196 the study.

197         Based on previous evidence that has linked empathy-related decisions to neural responses  
198 in the AI (Hein *et al.*, 2010; Masten *et al.*, 2011; Hein *et al.*, 2016b; Marsh, 2018), we assume  
199 that an incentive-related increase in the  $v$ - and/or  $z$ -parameter (reflecting facilitation of empathy-  
200 related decisions) is associated with an increase in brain regions associated with the processing of  
201 empathy and empathy-related decisions such as the AI and the ACC. In contrast, an incentive-  
202 related decrease in the  $v$ - and/or  $z$ -parameter (reflecting a potential undermining effect) should be  
203 related to a decrease in AI and ACC activity.

## 204 **Methods**

### 205 **Materials and Methods**

#### 206 *Participant details*

207         33 healthy women (mean age was 25.05 years, *s.e.* = 0.74) participated in the study. We  
208 chose a female instead of a gender-mixed subject group because it allowed us to choose female  
209 confederates and thus to avoid the potential complications of gender-mixed pairing of  
210 participants and confederates. The confederates were two female students, trained to play their  
211 roles in counterbalanced order. The data from two participants had to be discarded as outlier  
212 (frequency of prosocial decisions, 3.42 SDs below the mean ( $M_{empathy-alone} = 44.35$ ,  $SD_{empathy-alone} =$   
213  $12.97$ ). Thus, we analyzed 31 data sets. We obtained ethics approval (EK 458122014) for  
214 conducting the study and written informed consent from our participants. The experiment was  
215 conducted following the Helsinki guidelines. Participants received monetary compensation (show  
216 up fee plus payout from two randomly chosen trials of the allocation task; see below).

## 217 **Procedure**

### 218 *Overall procedure*

219 Outside the fMRI scanner, we attached pain electrodes to the back of the participants' and  
220 the confederates' hands and determined the individual thresholds for painful and painless  
221 stimulation using a standard procedure (Hein *et al.*, 2016a; Hein *et al.*, 2016b). Next, the  
222 participant and the confederates played a manipulated lottery (drawing matches) that ostensibly  
223 determined the amount of pain the person would receive in the following task. Because the  
224 empathy induction required saliently more pain for the confederates, the drawing of the matches  
225 was organized in such a way that the participant always drew the last match and thus was  
226 assigned to receive only a few painful stimuli.

227 The participant was placed inside the fMRI scanner, and one of the confederates was  
228 placed on a chair next to the participant in the scanner room. The confederate's hand with the pain  
229 electrode was placed on a tilted table over the participants' knee. Through a mirror in the head  
230 coil, participants could see the hand of the other, together with the visual stimulation on a screen  
231 that was positioned at the end of the fMRI bed. During the empathy induction, participants either  
232 saw a dark-coloured flash (painful stimulation) or a light-coloured flash (non-painful  
233 stimulation), indicating the intensity of the stimulation of the confederate. In a small portion of  
234 trials (five from fifteen), they received pain stimulation themselves, indicated by a dark-coloured  
235 flash of a different colour. During the decision task, participants were presented two options to  
236 allocate points between themselves and the other person. Colours were counterbalanced across  
237 participants.

238 The study started with the empathy induction, followed by the allocation task towards the  
239 first confederate. After replacing this confederate, the same procedure (empathy induction  
240 followed by the allocation task) was repeated with the second confederate (**Fig. 1**). In the

241 empathy-alone condition, the allocation task started immediately after the empathy induction. In  
242 the empathy-bonus condition, after the empathy induction, participants were told that they would  
243 receive a bonus (additional 5 Euro) if they chose the prosocial option in the majority of trials. We  
244 deliberately refrained from specifying the percentage of prosocial decisions that were required to  
245 win the bonus to avoid strategy effects. However, participants knew that the bonus would  
246 compensate the maximally possible outcome in the allocation task (i.e., the outcome that a  
247 participant would gain if she always chose the selfish option). Thus, deciding prosocially to reach  
248 the bonus in the empathy-bonus condition did not result in a financial loss for the participants. To  
249 minimize reputation effects, participants received the bonus information in private without the  
250 partner's knowledge.

251         Apart from the bonus in the empathy-bonus condition, the experimental procedure was  
252 identical in both conditions. The order of the conditions and the assignment of the confederates  
253 was counterbalanced across participants. At the end of the experiment, both confederates left, and  
254 the participants stayed in the scanner until anatomical image acquisition was completed. Finally,  
255 participants were asked to complete the Interpersonal Reactivity Index (IRI; (Davis, 1980)), and a  
256 scale that assessed their impression of both confederates (Hein *et al.*, 2016a). The impression  
257 ratings were comparable between confederates ( $\text{Imm } \chi^2_{(1)} = 0.36, p = .55, B = -0.10, s.e. = 0.16$ ).

258         Participants spent approximately 60 min inside the scanner, and the entire procedure  
259 lasted about 2 hours. In addition to the show-up fee, participants received the payout from two  
260 randomly chosen allocation trials, and the bonus of five Euro if they had made prosocial  
261 decisions in 75% of all trials.

262         All ratings during the induction phase and all decisions in the allocation task were kept  
263 anonymous. Particular care was taken to ensure that this was clear to participants by pointing out

264 the following: Inside the scanner room, the partner had a separate visual display, such that the  
265 participant viewed stimuli via back-projection from a mirror onto a screen, while the confederates  
266 beside the scanner viewed stimuli via cardboards/video glasses with a built-in display (Hein *et*  
267 *al.*, 2016a). Thus, all ratings and decisions were private and could not be observed by the other  
268 participants (Hein *et al.*, 2016a). Moreover, participants knew that they would not meet after the  
269 experiment because the scanned participant needed to stay longer for an anatomical scan. The  
270 experimenter was outside the scanner room, and it was pointed out that he could not see the  
271 ratings and decisions either.

### 272 *Empathy induction*

273 In each empathy-induction trial, first we presented a coloured arrow indicating the person  
274 who will receive the following electric stimulation for 1000 ms. After this cue, a fixation cross  
275 was presented for 1000 ms, followed by a coloured lightning bolt shown for 2000 ms.  
276 Participants were informed that a blinking dark-coloured lightning bolt indicates a painful  
277 stimulus, whereas a blinking light-coloured lightning bolt indicates a non-painful stimulus. After  
278 receiving or observing the electric stimulation, we showed a 9-point rating scale with the question  
279 "How do you feel?". The scale ranged from -4 (labeled "*very bad*") to +4 (labeled "*very good*").  
280 Participants had to respond within 4000 ms (**Fig. 2A**). The empathy induction consisted of 30  
281 trials: 10 that were ostensibly painful for the partner (other-pain trials), 5 that were not painful for  
282 the partner (other-no-pain trials), 5 painful trials for the participant (self-pain trials), and 10 non-  
283 painful trials (self-no-pain trials) for the participant. The self-pain trials were added to allow  
284 participants to simulate the state (pain) of the other person. To test their potential influence on  
285 empathy changes, we compared the ratings in other-pain trials that were preceded by a self-pain  
286 trial (i.e., empathy ratings under the condition of self-pain experience) with the ratings in other-

287 pain trials that were preceded by an other-pain trial (i.e., empathy ratings without preceding self-  
288 pain experience). The results showed no difference between the other-pain ratings after self-pain  
289 and the other-pain ratings without prior self-pain ( $t_{(61)} = 0.34$ ,  $p = .73$ ). Based on these results, the  
290 self-pain experience had no significant effect on empathy changes during empathy induction.

### 291 *Allocation task*

292 The allocation task was identical in both conditions and based on a well-established  
293 paradigm (Hein *et al.*, 2016b). In each trial, participants allocated points to themselves and the  
294 respective partner (**Fig. 2B**) and could choose between maximizing the relative outcome of the  
295 other person by reducing their own relative outcome (prosocial choice) and maximizing their own  
296 relative outcome at a cost to the partner (selfish choice). The outcome was relative to the outcome  
297 that the participant would have gained when choosing the other option. The initial number of  
298 points was always higher for the participant compared to the partners. This measure was inspired  
299 by previous behavioral economics research, showing that participants make more prosocial  
300 decisions if their initial payoff is higher than the partner's payoff ("advantageous inequality"  
301 (Fehr and Schmidt, 1999; Bolton and Ockenfels, 2000; Charness and Rabin, 2002)). The choice  
302 options used in the present study created advantageous inequality to optimize the number of  
303 prosocial choices, which was the main focus of our study.

304 For the point distributions, we used values between 900 and 1200. The respective value  
305 was divided into a self:other ratio of 60:40 or of 90:10. Each trial of the allocation task contained  
306 a prosocial and a selfish option. The prosocial option was always the more egalitarian option,  
307 with a point distribution of 60% (self) to 40% (other). In contrast, in the selfish option, points  
308 were allocated with a ratio of 90% (self) to 10% (other). Participants' losses were symmetrical to  
309 the partner's gains. For example, a total of 1000 points were distributed with self:other ratios of

310 60:40 (600:400 points), 90:10 (900:100 points). Thus, the participant's loss is  $900 - 600 = 300$   
311 points, which corresponds exactly to the gain of the partner ( $400 - 100 = 300$  points). We used  
312 these fixed and symmetrical ratios to minimize unspecific effects of loss aversion.

313 Each decision-trial started with an inter-trial interval indicated by a fixation cross  
314 presented for a period jittered between 4000 and 6000 ms (**Fig. 2B**). After this, participants saw  
315 the two possible distributions of points in different colours, indicating the potential gain for the  
316 participant and the potential gain for the current partner. Participants had to choose one of two  
317 distributions within 4000 ms by pressing the left button on a response box to select the  
318 distribution on the left side and the right button to select the distribution on the right side. The  
319 position of the two allocation options was randomized across trials to minimize response biases  
320 due to motor habituation. A green box appeared around the distribution that was selected by the  
321 participant at 4000 ms after distribution onset. The box was shown for 1000 ms. At the end of the  
322 experiment, two of the distributions chosen by the participant were randomly selected for  
323 payment (100 points = 50 cents). Participants performed 60 decision trials in each motive-  
324 induction condition, i.e., 120 trials in total.

### 325 *Pain stimulator*

326 For pain stimulation, we used electrical stimulation (bipolar, monophasic; output range  
327 5Hz, 0-10 mA) from a single-current stimulator (Neurometer CPT/C; Neurotron Inc.). After  
328 attaching the electrodes at the index finger of the right hand and connecting them to the single-  
329 current stimulator, the respective person was asked to press the button for defining the current  
330 threshold and to decide when she is feeling the stimulation – the value of this threshold was used  
331 as painless stimulation. In a second run the participant was asked to press the same button, but

332 now to hold it pressed until the pain was at an unacceptable level and then to release – this  
333 threshold was used for the painful stimulation.

### 334 **Experimental design and statistical analyses**

335 The aim of our study was to compare prosocial decisions driven by empathy alone with  
336 prosocial decisions driven by a combination of empathy and a financial bonus. Therefore, we  
337 used a within-subject design in which each participant performed the identical social decision  
338 task under two different conditions: the empathy-bonus and the empathy-alone condition.  
339 Behavioural data were analyzed with R-Studio Version 1.1.463(RStudio Team, 2020) and R  
340 Version 3.6.0(RCore Team, 2019) and Python (HDDM; Spyder Version 3.3.2; Python Version  
341 2.7.15 (Van Rossum, 2007; Wiecki *et al.*, 2013)).

#### 342 *Regression analyses*

343 All regression analyses were performed with the R-packages "stats" (RCore Team, 2019)  
344 using, "lme4" (Bates *et al.*, 2015), "car" (Fox and Weisberg, 2019), and MuMIn (Bartoń, 2019).  
345 Results were visualized with the "tidyverse" package (Wickham *et al.*, 2019). All continuous  
346 predictors in our regressions are z-scored.

347 Empathy ratings showed a right-skewed distribution (Shapiro-Wilk  $W = .94, p < .01$ ), so  
348 the data was log-transformed to normal distribution. Pearson correlation was computed between  
349 the empathy ratings and the empathic concern scale (EC) from the Interpersonal Reactivity Index  
350 (IRI)(Davis, 1980). In further data analyses, we used linear models within condition and linear  
351 mixed models (lmm) with participants as random effect between conditions.

352



353 *Drift-Diffusion Modeling*

354 We choose the DDM, because of its small but trackable number of key parameters and  
355 because it is relatively easy to reduce other sequential sampling models (SSMs) to the DDM  
356 given specific parameter constraints (Bogacz *et al.*, 2006). Moreover, because of the increasing  
357 popularity of DDMs in psychology research, the DDM results from our study can be embedded  
358 in the existing literature. We used hierarchical drift-diffusion modelling (HDDM  
359 (Vandekerckhove *et al.*, 2011; Wiecki *et al.*, 2013)), which is a version of the classical drift-  
360 diffusion model that exploits between-subject and within-subject variability using Bayesian  
361 parameter estimation methods and thus is ideal for use with relatively small sample sizes. The  
362 analyses were conducted using the python implementation of HDDM (Wiecki *et al.*, 2013).  
363 Based on previous studies showing changes in drift rate (Lerche *et al.*, 2018; Roberts and  
364 Hutcherson, 2019; Aylward *et al.*, 2020; Thompson and Steinbeis, 2021) and the starting point  
365 (White *et al.*, 2018) if decisions are made in different affective states, we assumed that these two  
366 parameters might also be affected by motivational states. However, given that the modulation of  
367 affect and motivation is not the same, effects on the third parameter (the  $a$ -parameter) are also  
368 possible. Therefore, we estimated the full model with  $v$ ,  $z$ , and  $a$  possibly being modulated by our  
369 two conditions. Moreover, we estimated the non-decision parameter ( $t_0$ ), which indicates the  
370 duration of all extradecisional processes like basic encoding or motor processes (Voss *et al.*,  
371 2004). In paradigms like ours that used an identical experimental setting across conditions, it was  
372 recommended to estimate the  $t_0$ -parameter across conditions (Wagenmakers *et al.*, 2008; Servant  
373 *et al.*, 2014; Nunez *et al.*, 2017). Following this recommendation, we estimated the  $t_0$ -parameter  
374 across the empathy-bonus and the empathy-alone conditions (mean  $t_0 = 0.58$ , s.e. = 0.02), and  
375 refrained from estimating it for each condition separately (see full HDDM results table at  
376 [github.com \(https://github.com/Vassil-Iotzov/empathy\\_incentives\)](https://github.com/Vassil-Iotzov/empathy_incentives)).

377           We conducted the same DDM analyses with two different inputs. In one analysis, the  
378 input of the DDM was defined categorically based on the type of response (1 = prosocial option;  
379 0 = selfish option). In the other analyses, we used the trial-by-trial point difference (self-loss or  
380 other-gain) as additional covariate effecting the drift rate to estimate a hierarchical random  
381 intercept model (see Chen and Krajbich (2018) for a similar approach). Other input parameters  
382 were reaction time (in seconds), condition (empathy-bonus, empathy-alone), and participants  
383 number (0 to 30).

384           To evaluate the model fit, we conducted posterior predictive checks by comparing the  
385 observed data with 500 datasets simulated by our model, thus using the method that has been  
386 particularly recommended for HDDMs to obtain quantile comparison and 95% credibility  
387 (Wiecki *et al.*, 2013)). The respective quantile comparison table is provided at [github.com](https://github.com)  
388 ([https://github.com/Vassil-Iotzov/empathy\\_incentives](https://github.com/Vassil-Iotzov/empathy_incentives)). Moreover, model convergence was  
389 checked by visual inspection of the estimation chain of the posteriors, as well as computing the  
390 Gelman-Rubin Geweke statistic for convergence (all values < 1.01) (Gelman and Rubin, 1992).  
391 Parameters of interest from the model were extracted for further analysis. Specifically, for each  
392 participant, the condition-specific  $v$ -parameters,  $z$ -parameters, and  $a$ -parameters were extracted  
393 (resulting in 6 parameters per participant). For the parameter comparison, the posteriors were  
394 analyzed directly, as recommended by Wiecki *et al.* (2013). Specifically, the probability was  
395 tested that the  $v$ -,  $z$ - or  $a$ -parameter was greater in the empathy-bonus compared to the empathy-  
396 alone condition.

397           The DDM results were visualized using a custom-made R-function based on `ggplot2` (part  
398 of the "tidyverse"-Package; (Wickham *et al.*, 2019)). The following equation was used to  
399 calculate the slopes of the  $v$ -parameters (Alexandrowicz, 2018):

400 (1)  $P(-|a, z, v) = \frac{e^{-(2va)} - e^{-(2vz)}}{e^{-(2va)} - 1}$

401 The equation was simplified by setting the variance of the Brownian motion at  $s^2 = 1$   
402 (Alexandrowicz, 2018) in the basic formula:

403 (2)  $P(-|a, z, v) = \frac{e^{-\frac{2va}{s^2}} - e^{-\frac{2vz}{s^2}}}{e^{-\frac{2va}{s^2}} - 1}$

404 The  $a$ -parameter was displayed by taking the higher alpha as 100% and calculating the  
405 lower alpha according to the respective ratio. The  $z$ -parameter was plotted as relative  $z$  ( $zr$ ) also in  
406 relation to the  $a$ -parameter. The full script is available at [github.com](https://github.com/Vassil-Iotzov/ggddm) ([https://github.com/Vassil-](https://github.com/Vassil-Iotzov/ggddm)  
407 [Iotzov/ggddm](https://github.com/Vassil-Iotzov/ggddm)).

#### 408 *Image Acquisition and Analyses*

409 The experiment was conducted on a 3-T Siemens Magnetom Prisma whole-body MR  
410 scanner (Siemens Healthineers), equipped with a one-channel Siemens head coil. Scanner noise  
411 was reduced with soft foam earplugs, and head motion was minimized with foam pads. Stimuli  
412 presented in the induction phase and in the allocation task were projected onto a rear projection  
413 screen located in the front of the scanner. Behavioural responses were recorded with a five-key  
414 fibre-optic response box placed on the right hand, and when necessary, vision was corrected  
415 using MRI-compatible lenses that matched the dioptré of the participant. Structural image  
416 acquisition consisted of 176 T1-weighted transversal images (voxel size of 1 mm) (Hein *et al.*,  
417 2016a). Functional imaging data was collected during the allocation task, using T2\*-weighted  
418 echo-planar imaging (32 slices, slice thickness of 3 mm, ascending acquisition; repetition time,  
419 2100 ms; echo time, 30 ms; flip angle, 80°; field of view, 240 mm; matrix, 80 × 80). In every  
420 decision session, 300 images were acquired - a total of 600 Images for both sessions.

421 *Preprocessing and statistical model*

422 The images were analyzed with SPM12 (Functional Imaging Laboratory, 2019) and  
423 Matlab version 8.6 (Matlab, 2015). Images were preprocessed following the standard procedure  
424 recommended in the SPM manual (Functional Imaging Laboratory, 2019), including realignment,  
425 slice time correction, coregistration, segmentation, normalize, smoothing.

426 First-level analyses were performed with the general linear model (GLM), using a  
427 canonical hemodynamic response function (HRF). For each of the conditions (empathy-alone and  
428 empathy-bonus condition), the respective regressors of prosocial choice trials were included as  
429 regressors of interest. The prosocial decisions regressor spanned the period from the onset of the  
430 decision screen until the participants' reaction (average of 1146.37 ms). Regressors of no interest  
431 included the period from the participants' reaction to decision offset (average of 2853.63 ms) and  
432 the immediately following period showing the participants' decision (1000 ms).

433 Sixteen of our participants made less than five selfish decisions in at least one condition.  
434 To avoid empty cells in the model, we refrained from computing direct contrasts between  
435 prosocial and selfish choices, and selfish choices were included as regressor of no interest.

436 For the second-level analyses, contrast images for comparisons of interest (empathy-  
437 bonus > implicit baseline, empathy-alone > implicit baseline, empathy-bonus > empathy-alone,  
438 and empathy-alone > empathy-bonus) were initially computed on a single-subject level. In the  
439 next step, the individual images of the main contrast of interest (empathy-bonus > implicit  
440 baseline) were regressed against the  $v$ -parameter. Results were thresholded using 5% family wise  
441 error (FWE) corrected voxel-based inference. We also conducted exploratory analyses using 5%  
442 FWE cluster-based inference with a cluster-forming threshold of  $P_{\text{uncorrected}} < .001$  and a minimal  
443 cluster size of  $k = 50$  and used this threshold for the visualization of our results. Beta estimates

444 were extracted from the entire clusters of activation in the anterior insula obtained from 5% FWE  
445 cluster-based inference with  $P < .001$  cluster-forming threshold,  $k = 50$ , using MarsBaR (Brett,  
446 2002). Moreover, the respective beta-estimates were extracted from an independent region of  
447 interest, defined based on a 20mm sphere around the peak coordinates ( $x = -43$ ;  $y = 14$ ;  $z = 7$ )  
448 from a significant activation likelihood cluster found across all pain empathy experiments in a  
449 current meta-analysis (Jauniaux *et al.*, 2019).

#### 450 *Code and data availability*

451 Behavioural data and scripts are available at [github.com](https://github.com) ([https://github.com/Vassil-](https://github.com/Vassil-Iotzov/empathy_incentives)  
452 [Iotzov/empathy\\_incentives](https://github.com/Vassil-Iotzov/empathy_incentives)). Imaging data are available at [neurovault.org](https://neurovault.org)  
453 (<https://identifiers.org/neurovault.collection:7568>).

## 454 **Results**

### 455 Empathy was induced with comparable strength in both conditions.

456 To quantify the strength of the induced empathy, we calculated the participants' trial-by-  
457 trial ratings while observing the partner in pain relative to their self-pain ratings. Comparing the  
458 ratings between the empathy-alone and the empathy-bonus condition revealed no significant  
459 differences between conditions ( $\text{Imm } \chi^2_{(1)} = 0.0001, p < .99, B = -0.002, s.e. = 0.22, R^2_m < .01$ ),  
460 indicating that empathy was induced with comparable strength in the empathy-alone and the  
461 empathy-bonus condition.

462 The average of the individual empathy ratings in both conditions, i.e., our measure of state  
463 empathy, correlated significantly with individual differences in trait empathy assessed with the  
464 empathic concern scale (EC) of the Interpersonal Reactivity Index (IRI; (Davis, 1980)),  $r_{(29)} =$   
465  $.36, p = .02$ . In contrast, the individual empathy ratings did not correlate with the personal  
466 distress (PD) subscale of the IRI and the individual empathy ratings,  $r_{(29)} = -.04, p = .82$ .

467 According to these results, the induced motive is related to empathic concern rather than personal  
468 distress.

469 The financial incentive increased the frequency of prosocial decisions, in particular if empathy  
470 was low.

471 Comparing the reaction times of prosocial decisions in the empathy-bonus and the  
472 empathy-alone condition revealed no significant difference, (lmm  $\chi^2_{(1)} = 2.24, p = .13, B = 0.27,$   
473  $s.e. = 0.18$ ). There was also no difference when only selfish decisions were considered (lmm  $\chi^2_{(1)}$   
474  $= 0.14, p = .71, B = -0.08, s.e. = 0.22$ ) and when all decisions were included (lmm  $\chi^2_{(1)} = 1.99, p$   
475  $= .16, B = 0.26, s.e. = 0.19$ ).

476 The frequency of prosocial decisions was significantly higher in the empathy-bonus  
477 condition compared to the empathy-alone condition (**Fig. 3A**), (lmm  $\chi^2_{(1)} = 14.35, p < .01, B = -$   
478  $0.57, s.e. = 0.15, R^2_m = .08$ ). We also computed the percent change in prosocial decisions in the  
479 empathy-bonus condition relative to the empathy-alone condition ((empathy-bonus - empathy-  
480 alone)/empathy-alone \* 100). The results revealed a significant relative increase of 23.88% ( $s.e. =$   
481  $7.91\%$ ),  $t_{(30)} = 3.02, p < .01$ .

482 In an additional analysis, we compared the number of prosocial decisions in the empathy-  
483 alone condition with the number of prosocial decisions in a baseline condition (without any  
484 motive induction) from a previous study using a similar paradigm and the same allocation task  
485 (Hein *et al.*, 2016b). The results revealed significantly more prosocial decisions in the empathy-  
486 alone condition compared to the baseline condition, empathy-alone ( $M = 73.92\%, s.e. = 0.39$ ),  
487 baseline condition ( $M = 49.37\%, s.e. = 0.32$ ), ( $t_{(59.963)} = 4.85, p < .01$ ).

488 We tested if that was induced before the decision task. A linear mixed model with  
489 reaction times of the prosocial decisions as dependent variable and empathy ratings, condition

490 (empathy-alone / empathy-bonus) and empathy ratings  $\times$  condition as predictors revealed a  
491 significant negative effect of empathy ratings (lmm  $\chi^2_{(1)} = 6.61, p = .01, B = -0.36, s.e. = 0.17$ ),  
492 which was comparable in both conditions, condition (lmm  $\chi^2_{(1)} = 2.17, p = .14, B = 0.27, s.e. =$   
493  $0.18$ ), condition  $\times$  empathy rating interaction (lmm  $\chi^2_{(1)} = 0.02, p = .89, B = -0.02, s.e. = 0.18; R^2_m$   
494  $= .15$ ). According to these results, higher empathy ratings predicted faster prosocial decisions.

495 A regression analysis with the percentage change in prosocial decisions as dependent  
496 variable and empathy ratings as predictor revealed a significant negative relationship ( $B = -0.42,$   
497  $s.e. = 0.17, p = .02, R^2 = .18$ ). The lower an individual's empathy ratings, the stronger the increase  
498 in the frequency of prosocial decisions in the empathy-bonus condition relative to the empathy-  
499 alone condition (**Fig. 3B**).

500  
501  
502

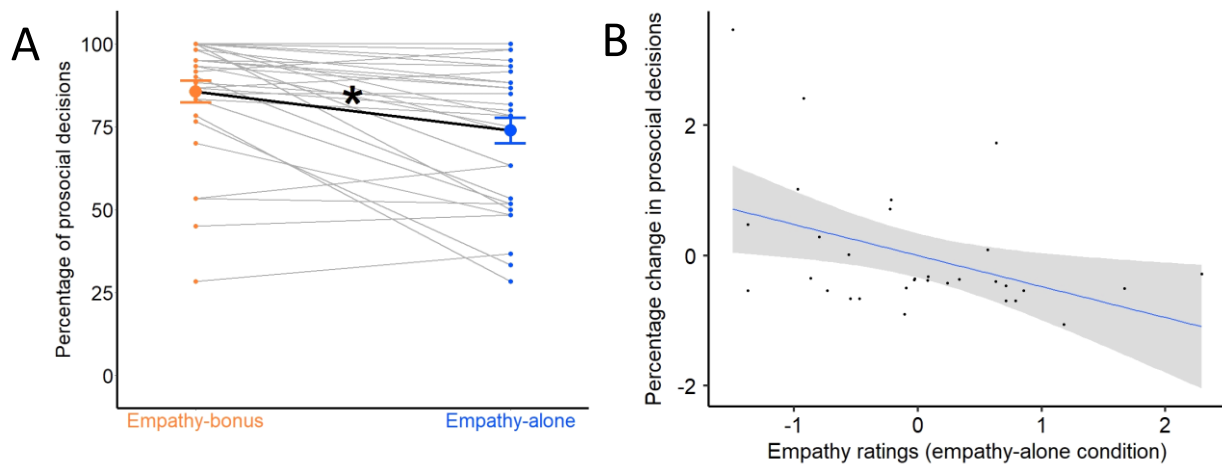

503  
504 **Fig. 3.** Percentage of prosocial decisions, reaction times and the relationship between the relative increase in  
505 prosocial decisions in the empathy-bonus condition and empathy ratings. **A)** Individual percentage of prosocial  
506 decisions in the empathy-bonus (orange) and the empathy-alone condition (blue). **B)** Negative relationship between  
507 the relative increase in prosocial decisions in the empathy-bonus condition and empathy ratings. The lower a  
508 participant's empathy rating, the higher the incentive-related increase in prosocial decisions.

509  
510  
511

512 The financial incentive increased the speed of information accumulation, but not the initial  
513 decision preference.

514 To specify which component of the prosocial decision process was enhanced by the  
515 financial incentive, relative to prosocial decisions in the empathy-alone condition, we used  
516 hierarchical drift-diffusion modelling (HDDM; (Vandekerckhove *et al.*, 2011; Wiecki *et al.*,  
517 2013)), a version of the classical drift-diffusion model that exploits between-subject and within-  
518 subject variability using Bayesian parameter estimation methods. We estimated the three  
519 aforementioned DDM parameters ( $v$ ,  $z$ ,  $a$ ) for every condition and participant. Comparing the  
520 observed data with 500 datasets simulated by the HDDM (Wiecki *et al.*, 2013) showed that the  
521 HDDM fit the data with 95% credibility (see quantile comparison table at [github.com](https://github.com/Vassil-Iotzov/empathy_incentives)  
522 ([https://github.com/Vassil-Iotzov/empathy\\_incentives](https://github.com/Vassil-Iotzov/empathy_incentives))).

523 We compared the speed of information accumulation (drift rate;  $v$ -parameters), the initial  
524 prosocial decision preferences (starting point;  $z$ -parameters), and the amount of integrated  
525 information ( $a$ -parameters) between the empathy-bonus and the empathy-alone condition. The  
526 comparison of the posteriors (Wiecki *et al.*, 2013) revealed high probability for a larger  $v$ -  
527 parameter in the empathy-bonus condition compared to the empathy-alone condition,  $v$ -empathy-  
528 bonus ( $M = 2.03$ ,  $s.e. = 0.22$ ),  $v$ -empathy-alone ( $M = 1.24$ ,  $s.e. = 0.19$ ), ( $p_{(v\text{-empathy-bonus} > v\text{-empathy-}$   
529  $alone)} = .99$ ; **Fig. 4A**). In contrast, the probability for a differences between the other decision  
530 parameters was relatively low,  $z$ -empathy-bonus ( $M = 0.47$ ,  $s.e. = 0.01$ ),  $z$ -empathy-alone ( $M =$   
531  $0.46$ ,  $s.e. = 0.01$ ;  $p_{(z\text{-empathy-bonus} > z\text{-empathy-alone)} = .54$ ),  $a$ -empathy-bonus ( $M = 1.96$ ,  $s.e. = 0.08$ ),  $a$ -  
532 empathy-alone ( $M = 1.88$ ,  $s.e. = 0.09$ ;  $p_{(a\text{-empathy-bonus} > a\text{-empathy-alone)} = .79$ ). This indicates that  
533 financial incentives enhanced the efficiency of the prosocial decision process, while leaving  
534 initial prosocial preferences unchanged.



535 Inspired by previous studies (Hutcherson *et al.*, 2015; Chen and Krajbich, 2018), in an  
536 additional analysis, we conducted a model that took the trial-by-trials difference in points for self  
537 vs other into account. To do so, we added the point difference (point for self vs points for other)  
538 as additional covariate effecting the drift rate (Chen and Krajbich, 2018). The results replicated  
539 the observed findings (high probability for a larger  $v$ -parameter in the empathy-bonus condition  
540 compared to the empathy-alone condition:  $v$ -empathy-bonus ( $M = 5.69$ ,  $s.e. = 0.22$ ),  $v$ -empathy-  
541 alone ( $M = 4.94$ ,  $s.e. = 0.19$ ),  $p_{(v\text{-empathy-bonus} > v\text{-empathy-alone})} = .99$ ), no differences between the other  
542 decision parameters  $z$ -parameter:  $z$ -empathy-bonus ( $M = 0.49$ ,  $s.e. = 0.01$ ),  $z$ -empathy-alone ( $M =$   
543  $0.47$ ,  $s.e. = 0.01$ ),  $p_{(z\text{-empathy-bonus} > z\text{-empathy-alone})} = .70$ ;  $a$ -parameter:  $a$ -empathy-bonus ( $M = 1.97$ ,  
544  $s.e. = 0.08$ ),  $a$ -empathy-alone ( $M = 1.89$ ,  $s.e. = 0.08$ ),  $p_{(a\text{-empathy-bonus} > a\text{-empathy-alone})} = .69$ ).

545  
546 The incentive-related facilitation of prosocial decisions and individual differences in empathy are  
547 associated with changes in anterior insula activation.

548 First, we conducted the main contrasts between the prosocial decision-related activation  
549 in the empathy-bonus vs the empathy-alone conditions and vice versa. Based on the applied  
550 statistical threshold ( $P_{(FWE\text{voxel-based})} < .05$ ) there were no significant results. This indicates that on  
551 average the same neural circuitries are involved in computing prosocial decisions driven by  
552 empathy and by empathy and the bonus.

553 Second, we identified neural regions that are related to an increase in drift rate in the  
554 empathy-bonus condition, i.e., the choice parameter that accounted for the facilitation of the  
555 prosocial decision process in the empathy-bonus compared to the empathy-alone condition. We  
556 regressed the individual  $v$ -parameters against the neural activation during prosocial decisions in  
557 the empathy-bonus condition, using a second-level regression. The results showed significant

558 activation in the left anterior insula (MNI peak coordinates,  $x = -27, y = 38, z = 5$ ; **Fig. 4B**) and  
559 the right lingual gyrus (MNI peak coordinates,  $x = 24, y = -67, z = -1$ ,  $P(\text{FWE voxel-based}) < .05$ ).

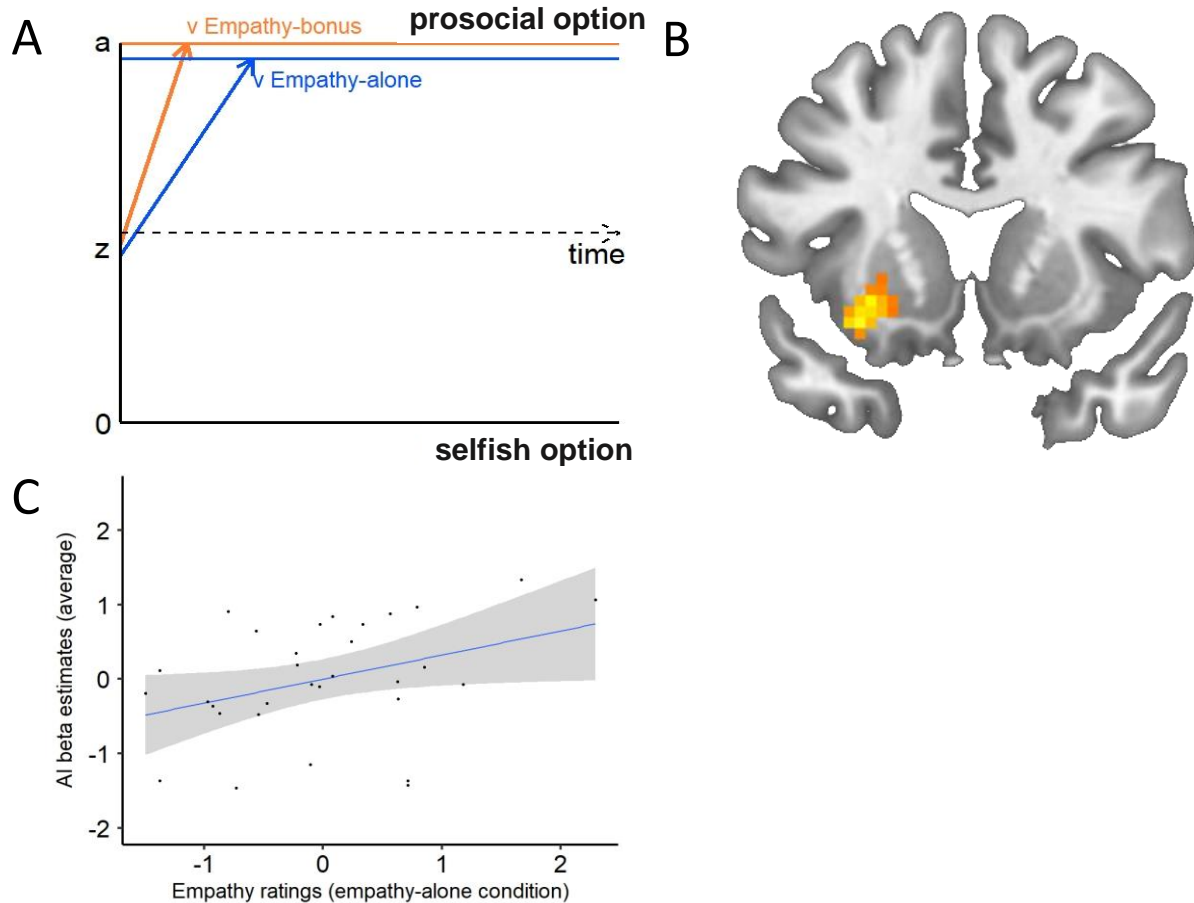

560  
561 **Fig. 4.** Drift-diffusion modelling (DDM) results and their relationship with neural responses in anterior insular cortex  
562 and empathy ratings. **A**) Visualization of the obtained DDM parameters showing an enhanced speed of information  
563 accumulation ( $v$ -parameter) in the empathy-bonus condition (orange) compared to the empathy-alone condition  
564 (blue). **B**) The neural response in the anterior insula (AI) correlates with the individual  $v$ -parameters in the empathy-  
565 bonus condition (visualized using 5% FWE cluster-based inference with  $P < .001$  cluster-forming threshold;  $k = 50$ ).  
566 The higher the speed of information accumulation in the empathy-bonus condition, the stronger the neural response  
567 in AI. **C**) Significant positive relationship between the individual strength of the AI response and the individual  
568 empathy ratings. The beta estimates reflect the average of AI activation from the empathy-bonus and the empathy-  
569 alone condition, extracted from the same AI clusters that correlated with the  $v$ -parameter in the empathy-bonus  
570 condition (shown in B).

571  
572 Exploratory analysis (5% FWE cluster-based inference with a cluster-forming threshold  
573 of  $P_{\text{uncorrected}} < .001$ ) further revealed activations in the right AI, inferior lingual gyrus and  
574 pallidum (**Table 1**).

575 **Table 1.** Neural results of the second-level regression between prosocial decision-related activity in the Empathy-  
576 bonus condition and the speed of information accumulation ( $v$ -parameter) in the Empathy-bonus condition. The  
577 asterisk (\*) indicates activations that are significant at 5% FWE voxel-based inference. We also conducted  
578 explorative analyses with 5% FWE cluster-based inference with a cluster-forming threshold of  $P < .001$  and a  
579 minimal cluster size of  $k = 50$ . Please note that peak-coordinates derived from cluster-wise inference only provide  
580 information about activated brain components, but not the exact brain region (Woo et al., 2014; Eklund et al., 2016).  
581

| Region                    | Hemisphere | x y z       | Cluster size | $t$ -value | P(FWE <sub>cluster-based</sub> ) |
|---------------------------|------------|-------------|--------------|------------|----------------------------------|
| Anterior Insula           | Left       | -27 38 5    | 97           | 6.24       | .007*                            |
|                           | Left       | -30 14 -13  | 59           | 4.86       | .048                             |
| Lingual gyrus             | Right      | 24 -67 -1   | 384          | 5.95       | .000*                            |
| Inferior lingual<br>gyrus | Left       | -51 -58 -19 | 181          | 5.23       | .000                             |
| Pallidum                  | Left       | -18 -7 -1   | 66           | 4.64       | .032                             |

582

583 Third, inspired by previous evidence relating individual differences in AI responses to  
584 individual differences in empathy (Hein *et al.*, 2010; Lamm *et al.*, 2011; Marsh, 2018), we tested  
585 if the observed AI region (i.e., the region that correlated with the speed of information  
586 accumulation in the empathy-bonus condition) was also related to the empathy ratings that we  
587 collected prior to the allocation task. To do so, we extracted the average of the beta estimates  
588 related to prosocial decisions in the empathy-bonus and the empathy-alone condition from the  
589 entire activated AI clusters and regressed them against the individual differences in empathy  
590 ratings. The results showed a significant positive effect of empathy ratings ( $B = 0.41$ ,  $s.e. = 0.19$ ,  
591  $p = .04$ ,  $R^2 = .14$ ). Because we used the average of the beta estimates from AI across both

592 conditions, we can infer that the observed AI activation, in general processes individual  
593 differences in empathy, i.e., unbiased by the specific experimental conditions. The higher a  
594 participant's empathy ratings, the stronger the neural response in the AI region, i.e. the same  
595 region that correlated with the speed of information accumulation in the empathy-bonus  
596 condition (**Fig. 4C**).

597 The financial incentive has a differential effect on anterior insular activation in high and low  
598 empathic individuals.

599         Given that the  $v$ -parameter and empathy ratings both are processed in the same AI region,  
600 it is plausible to assume that the two variables interact. To test that we conducted a linear mixed  
601 model with the beta estimates of AI activation during prosocial decisions in the empathy-bonus  
602 and the empathy-alone condition as a dependent variable. The individual  $v$ -parameters and  
603 empathy ratings were added as predictors, condition (empathy-bonus / empathy-alone) was added  
604 as a categorical variable. The results revealed significant main effects of condition (lmm  $\chi^2_{(1)} =$   
605 12.26,  $p < .01$ ,  $B = 0.67$ ,  $s.e. = 0.19$ ), empathy ratings (lmm  $\chi^2_{(1)} = 4.43$ ,  $p = .04$ ,  $B = 0.33$ ,  $s.e. =$   
606 0.16) and the  $v$ -parameter (lmm  $\chi^2_{(1)} = 25.60$ ,  $p < .01$ ,  $B = 0.68$ ,  $s.e. = 0.13$ ). Moreover, there  
607 were significant interactions between empathy ratings x  $v$ -parameter (lmm  $\chi^2_{(1)} = 5.60$ ,  $p = .02$ ,  $B$   
608  $= -0.40$ ,  $s.e. = 0.17$ ), and condition x  $v$ -parameter (lmm  $\chi^2_{(1)} = 4.23$ ,  $p = .04$ ,  $B = -0.41$ ,  $s.e. =$   
609 0.20), but not between condition x empathy ratings (lmm  $\chi^2_{(1)} = 0.14$ ,  $p = .71$ ,  $B = 0.08$ ,  $s.e. =$   
610 0.22). Finally, the analysis showed a significant condition x  $v$ -parameter x empathy rating  
611 interaction (lmm  $\chi^2_{(1)} = 10.75$ ,  $p < .01$ ,  $B = 0.70$ ,  $s.e. = 0.21$ ,  $R^2_m = .49$ ).

612         **Table 1** shows that also other brain regions correlated with the individual increase in  $v$ -  
613 parameters in the empathy-bonus condition. To test if these regions are also shaped by the  
614 interaction between the empathy ratings and the  $v$ -parameter, we conducted the same analysis

615 with the beta estimates extracted from the pallidum, right lingual gyrus and left inferior lingual  
616 gyrus. The results revealed no significant interactions between empathy ratings and the  $v$ -  
617 parameter and no significant empathy ratings  $\times$   $v$ -parameter  $\times$  condition interactions in any of  
618 these regions (empathy ratings  $\times$   $v$ -parameter, pallidum (Imm  $\chi^2_{(1)} = 1.53, p = .22, B = -0.27, s.e.$   
619  $= 0.21$ ), right lingual gyrus (Imm  $\chi^2_{(1)} = 0.91, p = .34, B = -0.20, s.e. = 0.21$ ), left inferior lingual  
620 gyrus (Imm  $\chi^2_{(1)} < 0.01, p = .98, B = -0.01, s.e. = 0.22$ ); empathy ratings  $\times$   $v$ -parameter  $\times$   
621 condition, pallidum (Imm  $\chi^2_{(1)} = 0.77, p = .38, B = 0.24, s.e. = 0.27$ ), right lingual gyrus (Imm  
622  $\chi^2_{(1)} = 0.48, p = .49, B = 0.19, s.e. = 0.28$ ), left inferior lingual gyrus (Imm  $\chi^2_{(1)} = 0.22, p = .64, B$   
623  $= 0.13, s.e. = 0.29$ )). This indicates that the observed effects are specifically related to neural  
624 responses in the AI.

625 To unpack the significant condition  $\times$   $v$ -parameter  $\times$  empathy rating interaction in AI, we  
626 tested the relationship between the  $v$ -parameter and the empathy ratings separately in the  
627 empathy-alone and the empathy-bonus condition. We found a significant negative empathy  $\times$   $v$ -  
628 parameter interaction in the empathy-bonus condition ( $B = -0.37, s.e. = 0.14, p = .02$ ), with  
629 significant main effects of  $v$  ( $B = 0.70, s.e. = 0.11, p < .01$ ) and empathy ratings ( $B = 0.29, s.e. =$   
630  $0.13, p = .04, R^2 = .65$ ; **Fig. 5A**). The results for the empathy-alone condition revealed a marginal  
631 significant positive empathy  $\times$   $v$ -parameter interaction ( $B = 0.30, s.e. = 0.16, p = .07$ ) with a  
632 significant main effect of the empathy ratings ( $B = 0.43, s.e. = 0.18, p = .03$ ) and no main effect of  
633 the  $v$ -parameter ( $B = 0.25, s.e. = 0.18, p = .19; R^2 = .31$ , **Fig. 5B**).

634 To further unpack the two-way interactions, we tested the relationship between the  $v$ -  
635 parameter and anterior insula (AI) beta estimates, as well as the relationship between empathy  
636 ratings and AI beta estimates separately in the empathy-bonus and the empathy-alone condition.  
637 Given that empathy facilitates prosocial decisions (Batson *et al.*, 1995; Decety *et al.*, 2016) and  
638 correlates with neural responses in AI cortex, we assumed a positive relationship between the

639 empathy ratings and the drift ratings and empathy ratings and AI activation. To test these apriori  
640 assumptions, we used one-sided tests (Pfaffenberger and Patterson, 1977; Ruxton and Neuhäuser,  
641 2010). In the empathy-alone condition, the results revealed a significant positive relationship  
642 between  $\nu$ -parameter and AI beta estimates ( $B = 0.38$ ,  $s.e. = 0.19$ ,  $p = .02$ , **Fig. 5F**), a significant  
643 positive relationship between empathy ratings and AI beta estimates ( $B = 0.43$ ,  $s.e. = 0.18$ ,  $p =$   
644  $.01$ , **Fig. 5D**), and a significant positive relationship between empathy ratings and drift rate ( $B =$   
645  $0.30$ ,  $s.e. = 0.18$ ,  $p = .05$ ). In the empathy-bonus condition we observed a significant positive  
646 relationship between  $\nu$ -parameter and AI beta estimates ( $B = 0.73$ ,  $s.e. = 0.12$ ,  $p < .01$ , **Fig. 5E**),  
647 while the relationships between empathy ratings and AI beta estimates ( $B = 0.23$ ,  $s.e. = 0.16$ ,  $p =$   
648  $.08$ , **Fig. 5C**) and between empathy ratings and drift rate were not significant ( $B = 0.21$ ,  $s.e. =$   
649  $0.17$ ,  $p = .10$ ). The finding of a positive relationship between empathy ratings and the drift rate  
650 and empathy ratings and AI beta estimates in the empathy-alone condition is in line with previous  
651 evidence showing that empathy facilitates prosocial decisions (Batson *et al.*, 1995; Decety *et al.*,  
652 2016). In the empathy-bonus condition, the relationship between empathy ratings and drift rate  
653 and empathy ratings and AI estimates was no longer significant, indicating that in the presence of  
654 an incentive, empathy was no longer a significant driver of prosocial decisions. Interestingly, the  
655 interaction between the empathy ratings and the drift rate reduced AI activation in the empathy-  
656 bonus condition while increasing it in the empathy-alone condition. This indicates that in the  
657 empathy-bonus condition the empathy ratings (indicating the strength of the empathy motive  
658 before the bonus was offered) suppress the positive effect of the  $\nu$ -parameter on the neural  
659 response in AI.

660

661

662

663

Empathy-bonus

Empathy-alone

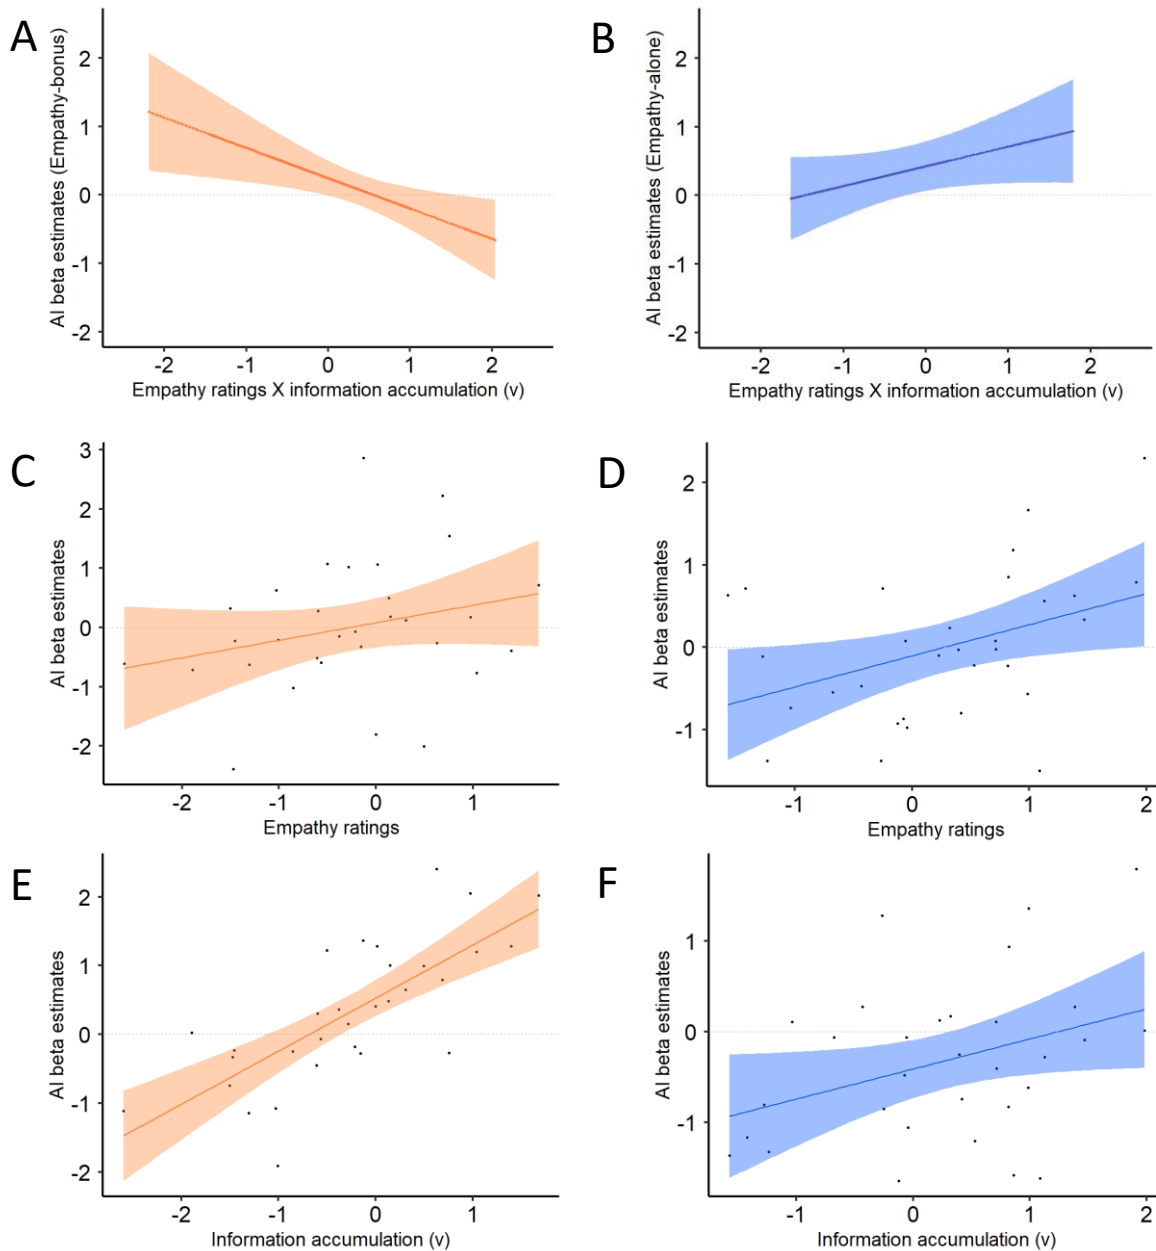

664

665

666 **Fig. 5.** Relationships between anterior insula (AI) beta estimates and empathy ratings and between AI beta  
667 estimates and speed of information processing ( $v$ -parameter) in the empathy-bonus and empathy-alone  
668 conditions. The beta estimates reflect the average of AI activation from the empathy-bonus and the  
669 empathy-alone condition, extracted from the same AI clusters that correlated with the  $v$ -parameter in the  
670 empathy-bonus condition (shown in **Fig. 4B**). **A**) Effect of the empathy ratings x  $v$ -parameters  
671 interaction on AI responses in the empathy-bonus condition. **B**) Effect of the empathy ratings x  $v$ -parameters  
672 interaction on AI responses in the empathy-alone condition. **C**) The relationship between the individual  
673 strength of the AI responses and the individual empathy ratings in the empathy-bonus condition was not  
674 significant. **D**) Significant positive relationship between the individual strength of the AI responses and  
675 the individual empathy ratings in the empathy-alone condition. **E**) Significant positive relationship

676 between the individual strength of the AI responses and the speed of information processing ( $v$ -parameter)  
677 in the empathy-bonus condition. **F)** Significant positive relationship between the individual strength of the  
678 AI responses and the speed of information processing ( $v$ -parameter) in the empathy-alone condition.

679  
680 To test the robustness of the differential effects in the empathy-bonus and the empathy-  
681 alone conditions, we extracted the beta-estimates of prosocial decision-related activation in the  
682 empathy-bonus and the empathy-alone condition from an independent region of interest in the AI  
683 (defined based on the peak coordinates reported in a recent meta-analysis on empathy of pain  
684 studies (Jauniaux *et al.*, 2019). We conducted a linear mixed model with these beta-estimates as  
685 dependent variable, and condition (empathy-bonus / empathy – alone), empathy ratings, and  $v$ -  
686 parameters as predictors. The results replicated the significant condition  $\times$   $v$ -parameter  $\times$  empathy  
687 rating interaction reported above (lmm  $\chi^2_{(1)} = 5.81, p = .02, B = 0.61, s.e. = 0.25, R^2_m = .19$ ),  
688 reflecting a negative relationship in the empathy-bonus condition and a positive relationship in  
689 the empathy-alone condition.

## 690 **Discussion**

691 Our study investigated how financial incentives affect empathy-related prosocial  
692 decisions. The results show that on average financial incentives increase the frequency of  
693 prosocial decisions (**Fig. 3A**), in particular in individuals that scored low on empathy (**Fig. 3B**).  
694 The finding that the financial bonus enhanced the frequency of prosocial decisions is in line with  
695 previous studies showing an incentive-related increase in prosocial behaviours (Balliet *et al.*,  
696 2011; Stoop *et al.*, 2018). Extending this previous evidence, our results reveal that this effect is  
697 modulated by individual differences in empathy, i.e., stronger if a person's empathic motivation is  
698 low. Besides providing insights into the interplay between financial incentives and empathy, our  
699 results specified how financial incentives affect the prosocial decision process. The results of



700 drift-diffusion modelling showed that the financial incentive enhanced the efficiency (i.e., speed  
701 of information accumulation captured by the  $v$ -parameter) of prosocial decisions in the empathy-  
702 bonus compared to the empathy-alone condition (**Fig. 4A**). In contrast, the incentive had no  
703 significant effect on participants' initial prosocial preferences, i.e., the preference of making a  
704 selfish or prosocial decision with which they entered the decision process (captured by the  $z$ -  
705 parameter).

706 Outside the domain of prosocial decisions, there is evidence that the efficiency of  
707 decisions (captured by the  $v$ -parameter) is affected by individual differences in emotions (Lerche  
708 *et al.*, 2018; Roberts and Hutcherson, 2019; Aylward *et al.*, 2020; Thompson and Steinbeis,  
709 2021). For example, according to the results of Thompson and Steinbeis (2021), individuals with  
710 greater state anxiety show increased  $v$ -parameter on fearful face trials. Extending these findings,  
711 our results reveal that the speed of information accumulation is shaped by the motivation that  
712 drive participants' prosocial decisions, i.e., higher if a prosocial decision is rewarded than if it is  
713 only based on empathy.

714 On the neural level, the incentive-related facilitation of the prosocial decision process was  
715 related to the participants' neural response in the left anterior insula (AI; **Fig. 4B**). Previous  
716 neuroscience research has associated the anterior insula activity with empathy (Hein *et al.*, 2010;  
717 Lamm *et al.*, 2011; Masten *et al.*, 2011; Hein *et al.*, 2016b; Marsh, 2018) and the propensity for  
718 prosocial decisions (Hein *et al.*, 2010; Masten *et al.*, 2011; Hein *et al.*, 2016b; Marsh, 2018). In  
719 line with this previous evidence, our results show that the facilitation of prosocial decisions  
720 (captured by an increased speed of information accumulation) is related to an increase of AI  
721 responses (**Fig. 4B**) and that this same AI region also correlated with individual differences in  
722 empathy (**Fig. 4C**).

723 Adding a novel aspect, our findings reveal how financial incentives alter the effect of  
724 empathy on the computation of prosocial decisions in the anterior insular cortex. After offering a  
725 bonus in the empathy-bonus condition, the relationship between empathy ratings and drift rate  
726 and empathy ratings and AI estimates was no longer significant, indicating that in the presence of  
727 an incentive, empathy was no longer a significant driver of prosocial decisions. Interestingly, the  
728 interaction between the empathy ratings and the drift rate significantly reduced AI activation in  
729 the empathy-bonus condition (**Fig. 5A**) while increasing it in the empathy-alone condition (**Fig.**  
730 **5B**). This indicates that in the empathy-bonus condition, the strength of the empathy motive  
731 (captured by the individual strength of the empathy ratings before the bonus was offered)  
732 suppressed the positive relationship between information accumulation during prosocial decisions  
733 and the neural response in AI. Together, these findings indicate that the anterior insula integrates  
734 self-regarding (gaining the financial incentive) and other-regarding (empathy with the other  
735 person) motives that both elicit prosocial decisions and thus forms a plausible neural basis for the  
736 impact of financial incentives on empathic motivation.

737 In our study, empathy was conceptualized as a motive that can drive prosocial decisions.  
738 And indeed, the empathy ratings of our participants that correlated with empathic concern (but  
739 not personal distress) facilitated the prosocial decision process in the empathy-alone condition, in  
740 line with previous findings (Batson *et al.*, 1995; Decety *et al.*, 2016). That said, the result that  
741 financial incentives counteracted the facilitating effect of empathy on prosocial decisions in  
742 highly empathic individuals might indicate that highly empathic individuals are less motivated to  
743 empathize in the presence of an incentive, an assumption that supports the notion that empathy  
744 itself is a motivated state (Zaki, 2014).

745 The financial incentive for prosocial decisions was offered in private, and self-image  
746 concerns were reduced as far as possible, at least with regard to public reputation. However,

747 some highly empathic participants nevertheless showed an incentive-related decline in prosocial  
748 decisions (see also **Fig. 3B**). It is conceivable that highly empathic participants feel insulted by  
749 the bonus because "being paid to be nice" undermined their intrinsic empathic motivation that  
750 otherwise (i.e., in the empathy-alone condition) drives their prosocial decisions. Thus, although  
751 on average our findings show that the incentive increased the frequency of prosocial decisions  
752 compared to an empathy-alone condition, it is still possible that it undermines prosocial behavior  
753 in highly empathic participants. To test this assumption, future studies should test the effect of  
754 financial incentives on empathy-based decisions in extreme groups, i.e., groups of extremely high  
755 or low empathic individuals. Moreover, it would be interesting to use a trial-by-trial bonus  
756 manipulation that allows for modelling the effect directly as part of the DDM.

757 In summary, our current results indicate that financial incentives offered in private  
758 facilitate prosocial decisions in low empathic individuals but have little effect in case of strong  
759 empathic motivation.

760

761

## 762 **References**

763

764 Alexandrowicz, R. W. (2018) 'The diffusion model visualizer: an interactive tool to understand  
765 the diffusion model parameters', *Psychological Research*.

766 Ariely, D., Bracha, A. & Meier, S. (2009) 'Doing good or doing well? Image motivation and  
767 monetary incentives in behaving prosocially', *American Economic Review*, **99**(1), pp. 544-555.

768 Aylward, J., Hales, C., Robinson, E. & Robinson, O. J. (2020) 'Translating a rodent measure of  
769 negative bias into humans: the impact of induced anxiety and unmedicated mood and anxiety  
770 disorders', *Psychological medicine*, **50**(2), pp. 237-246.

771 Balliet, D., Mulder, L. B. & Van Lange, P. A. M. (2011) 'Reward, punishment, and cooperation:  
772 A meta-analysis', *Psychological Bulletin*, **137**(4), pp. 594-615.

773 Bartoń, K. (2019) 'MuMIn: Multi-Model Inference, R package version 1.43.15'.

- 774 Bates, D., Mächler, M., Bolker, B. & Walker, S. (2015) 'Fitting Linear Mixed-Effects Models  
775 Using lme4', *Journal of Statistical Software*, **67**, p. 48.
- 776 Batson, C. D., Duncan, B. D., Ackerman, P., Buckley, T. & Birch, K. (1981) 'Is empathic  
777 emotion a source of altruistic motivation?', *Journal of personality and social psychology*, **40**(2),  
778 pp. 290-302.
- 779 Batson, C. D., Turk, C. L., Shaw, L. L. & Klein, T. R. (1995) 'Information function of empathic  
780 emotion: Learning that we value the other's welfare', *Journal of personality and social  
781 psychology*, **68**(2), p. 300.
- 782 Benabou, R. & Tirole, J. (2006) 'Incentives and prosocial behavior', *American Economic Review*,  
783 **96**(5), pp. 1652-1678.
- 784 Besley, T. & Ghatak, M. (2018) 'Prosocial Motivation and Incentives', *Annual Review of  
785 Economics*, Vol 10, **10**, pp. 411-438.
- 786 Bogacz, R., Brown, E., Moehlis, J., Holmes, P. & Cohen, J. D. (2006) 'The physics of optimal  
787 decision making: a formal analysis of models of performance in two-alternative forced-choice  
788 tasks', *Psychological review*, **113**(4), pp. 700-765.
- 789 Bolton, G. E. & Ockenfels, A. (2000) 'ERC: A Theory of Equity, Reciprocity, and Competition',  
790 *American Economic Review*, **90**(1), pp. 166-193.
- 791 Bowles, S. (2008) 'Policies Designed for Self-Interested Citizens May Undermine “The Moral  
792 Sentiments”': Evidence from Economic Experiments', *Science (New York, N.Y.)*, **320**, pp. 1605-  
793 1609.
- 794 Brett, M. A., Jean-Luc; Valabregue Romain; Poline, Jean-Baptiste (2002) 'Region of interest  
795 analysis using an SPM toolbox', *8th International Conference on Functional Mapping of the  
796 Human Brain*, Sendai, Japan, NeuroImage.
- 797 Charness, G. & Rabin, M. (2002) 'Understanding Social Preferences with Simple Tests\*', *The  
798 Quarterly Journal of Economics*, **117**(3), pp. 817-869.
- 799 Chen, F. & Krajbich, I. (2018) 'Biased sequential sampling underlies the effects of time pressure  
800 and delay in social decision making', *Nature Communications*, **9**(1), p. 3557.
- 801 Davis, M. H. (1980) 'A multidimensional approach to individual differences in empathy', *JSAS  
802 Catalogue of Selected Documents in Psychology*, **10**.
- 803 Decety, J., Bartal, I. B.-A., Uzefovsky, F. & Knafo-Noam, A. (2016) 'Empathy as a driver of  
804 prosocial behaviour: highly conserved neurobehavioural mechanisms across species',

- 805 *Philosophical transactions of the Royal Society of London. Series B, Biological sciences*,  
806 **371**(1686), pp. 20150077-20150077.
- 807 Deci, E. L., Koestner, R. & Ryan, R. M. (1999) 'A meta-analytic review of experiments  
808 examining the effects of extrinsic rewards on intrinsic motivation', *Psychol Bull*, **125**(6), pp. 627-  
809 668; discussion 692-700.
- 810 Eklund, A., Nichols, T. E. & Knutsson, H. (2016) 'Cluster failure: Why fMRI inferences for  
811 spatial extent have inflated false-positive rates', *Proceedings of the National Academy of  
812 Sciences*, **113**(28), pp. 7900-7905.
- 813 Exley, C. (2017) 'Incentives for prosocial behavior: The role of reputations', *Management  
814 Science*, **64**(5), pp. 2460-2471.
- 815 Fehr, E. & Schmidt, K. M. (1999) 'A Theory of Fairness, Competition, and Cooperation\*', *The  
816 Quarterly Journal of Economics*, **114**(3), pp. 817-868.
- 817 Forstmann, B. U., Ratcliff, R. & Wagenmakers, E. J. (2016) 'Sequential Sampling Models in  
818 Cognitive Neuroscience: Advantages, Applications, and Extensions', *Annual review of  
819 psychology*, **67**, pp. 641-666.
- 820 Fox, J. & Weisberg, S. (2019) *An R Companion to Applied Regression*, Thousand Oaks CA,  
821 Sage.
- 822 Functional Imaging Laboratory, W. T. C. f. N., Institute of Neurology, UCL (2019) 'SPM12  
823 Manual'.
- 824 Garbers, Y. & Konradt, U. (2014) 'The effect of financial incentives on performance: A  
825 quantitative review of individual and team-based financial incentives', *Journal of Occupational  
826 and Organizational Psychology*, **87**(1), pp. 102-137.
- 827 Gelman, A. & Rubin, D. B. (1992) 'Inference from Iterative Simulation Using Multiple  
828 Sequences', *Statistical Science*, **7**(4), pp. 457-472.
- 829 Hein, G., Engelmann, J. B., Vollberg, M. C. & Tobler, P. N. (2016a) 'How learning shapes the  
830 empathic brain', *Proceedings of the National Academy of Sciences*, **113**(1), pp. 80-85.
- 831 Hein, G., Morishima, Y., Leiberg, S., Sul, S. & Fehr, E. (2016b) 'The brain's functional network  
832 architecture reveals human motives', *Science*, **351**(6281), pp. 1074-1078.
- 833 Hein, G., Silani, G., Preuschhoff, K., Batson, C. D. & Singer, T. (2010) 'Neural responses to  
834 ingroup and outgroup members' suffering predict individual differences in costly helping',  
835 *Neuron*, **68**(1), pp. 149-160.

- 836 Holmås, T. H., Kjerstad, E., Lurås, H. & Straume, O. R. (2010) 'Does monetary punishment  
837 crowd out pro-social motivation? A natural experiment on hospital length of stay', *Journal of*  
838 *Economic Behavior & Organization*, **75**(2), pp. 261-267.
- 839 Hutcherson, C. A., Bushong, B. & Rangel, A. (2015) 'A Neurocomputational Model of Altruistic  
840 Choice and Its Implications', *Neuron*, **87**(2), pp. 451-462.
- 841 Jauniaux, J., Khatibi, A., Rainville, P. & Jackson, P. L. (2019) 'A meta-analysis of neuroimaging  
842 studies on pain empathy: investigating the role of visual information and observers' perspective',  
843 *Social Cognitive and Affective Neuroscience*, **14**(8), pp. 789-813.
- 844 Lamm, C., Decety, J. & Singer, T. (2011) 'Meta-analytic evidence for common and distinct  
845 neural networks associated with directly experienced pain and empathy for pain', *NeuroImage*,  
846 **54**(3), pp. 2492-2502.
- 847 Lerche, V., Neubauer, A. B. & Voss, A. (2018) 'Effects of implicit fear of failure on cognitive  
848 processing: A diffusion model analysis', *Motivation and Emotion*, **42**(3), pp. 386-402.
- 849 Marsh, A. A. (2018) 'The neuroscience of empathy', *Current opinion in behavioral sciences*, **19**,  
850 pp. 110-115.
- 851 Masten, C. L., Morelli, S. A. & Eisenberger, N. I. (2011) 'An fMRI investigation of empathy for  
852 'social pain' and subsequent prosocial behavior', *NeuroImage*, **55**(1), pp. 381-388.
- 853 Matlab (2015) *version 8.6 (R2015b)*, Natick, Massachusetts, The MathWorks Inc.
- 854 Murayama, K., Matsumoto, M., Izuma, K. & Matsumoto, K. (2010) 'Neural basis of the  
855 undermining effect of monetary reward on intrinsic motivation', *Proc Natl Acad Sci U S A*,  
856 **107**(49), pp. 20911-20916.
- 857 Niza, C., Tung, B. & Marteau, T. M. (2013) 'Incentivizing blood donation: Systematic review and  
858 meta-analysis to test Titmuss' hypotheses', *Health Psychology*, **32**(9), pp. 941-949.
- 859 Nunez, M. D., Vandekerckhove, J. & Srinivasan, R. (2017) 'How attention influences perceptual  
860 decision making: Single-trial EEG correlates of drift-diffusion model parameters', *Journal of*  
861 *mathematical psychology*, **76**(Pt B), pp. 117-130.
- 862 Pfaffenberger, R. C. & Patterson, J. H. (1977) *Statistical methods for business and economics*,  
863 RD Irwin.
- 864 Ratcliff, R., Smith, P. L., Brown, S. D. & McKoon, G. (2016) 'Diffusion Decision Model:  
865 Current Issues and History', *Trends in cognitive sciences*, **20**(4), pp. 260-281.

- 866 RCore Team (2019) 'R: A Language and Environment for Statistical Computing', Vienna,  
867 Austria.
- 868 Roberts, I. D. & Hutcherson, C. A. (2019) 'Affect and Decision Making: Insights and Predictions  
869 from Computational Models', *Trends in cognitive sciences*, **23**(7), pp. 602-614.
- 870 Rode, J., Gómez-Baggethun, E. & Krause, T. (2015) 'Motivation crowding by economic  
871 incentives in conservation policy: A review of the empirical evidence', *Ecological Economics*,  
872 **117**, pp. 270-282.
- 873 RStudio Team (2020) 'RStudio: Integrated Development Environment for R', Boston, MA.
- 874 Ruxton, G. D. & Neuhäuser, M. (2010) 'When should we use one-tailed hypothesis testing?',  
875 *Methods in Ecology and Evolution*, **1**(2), pp. 114-117.
- 876 Servant, M., Montagnini, A. & Burle, B. (2014) 'Conflict tasks and the diffusion framework:  
877 Insight in model constraints based on psychological laws', *Cognitive Psychology*, **72**, pp. 162-  
878 195.
- 879 Stoop, J., van Soest, D. & Vyrastekova, J. (2018) 'Rewards and cooperation in social dilemma  
880 games', *Journal of Environmental Economics and Management*, **88**(C), pp. 300-310.
- 881 Thompson, A. & Steinbeis, N. (2021) 'Computational modelling of attentional bias towards threat  
882 in paediatric anxiety', *Developmental Science*, **n/a**(n/a), p. e13055.
- 883 Titmuss, R. M. (1970) *The Gift Relationship: From Human Blood to Social Policy*, London,,  
884 Allen & Unwin.
- 885 Van Rossum, G. (2007) 'Python programming language', *USENIX annual technical conference*.
- 886 Vandekerckhove, J., Tuerlinckx, F. & Lee, M. D. (2011) 'Hierarchical diffusion models for two-  
887 choice response times', *Psychological methods*, **16**(1), pp. 44-62.
- 888 Voss, A., Rothermund, K. & Voss, J. (2004) 'Interpreting the parameters of the diffusion model:  
889 an empirical validation', *Mem Cognit*, **32**(7), pp. 1206-1220.
- 890 Wagenmakers, E.-J., Ratcliff, R., Gomez, P. & McKoon, G. (2008) 'A Diffusion Model Account  
891 of Criterion Shifts in the Lexical Decision Task', *Journal of memory and language*, **58**(1), pp.  
892 140-159.
- 893 Wei, L. T. & Yazdanifard, R. (2014) 'The impact of Positive Reinforcement on Employees'  $\bar{}$   
894 Performance in Organizations', *American Journal of Industrial and Business Management*,  
895 **Vol.04No.01**, p. 4.

896 White, C. N., Liebman, E. & Stone, P. (2018) 'Decision mechanisms underlying mood-congruent  
897 emotional classification', *Cognition and Emotion*, **32**(2), pp. 249-258.

898 Wickham, H., Averick, M., Bryan, J., Chang, W., McGowan, L., François, R., Grolemund, G.,  
899 Hayes, A., Henry, L., Hester, J., Kuhn, M., Pedersen, T., Miller, E., Bache, S., Müller, K., Ooms,  
900 J., Robinson, D., Seidel, D., Spinu, V. & Yutani, H. (2019) 'Welcome to the Tidyverse', *Journal*  
901 *of Open Source Software*, **4**, p. 1686.

902 Wiecki, T. V., Sofer, I. & Frank, M. J. (2013) 'HDDM: Hierarchical Bayesian estimation of the  
903 drift-diffusion model in Python', *Frontiers in neuroinformatics*, **7**, p. 14.

904 Woo, C. W., Krishnan, A. & Wager, T. D. (2014) 'Cluster-extent based thresholding in fMRI  
905 analyses: pitfalls and recommendations', *NeuroImage*, **91**, pp. 412-419.

906 Zaki, J. (2014) 'Empathy: a motivated account', *Psychological Bulletin*, **140**(6), p. 1608.

907

#### 908 **Funding**

909 This work was supported by the German Research Foundation (HE 4566/2-1; HE 4566/5-1).

#### 910 **Acknowledgments**

911 We thank Isabelle Ehrlich for help with data collection and Marthe Gründahl and Martin Weiß  
912 for feedback on the manuscript.

#### 913 **Authors' Contributions**

914 Grit Hein and Vassil Iotzov designed the research with input from Jochen Kaiser; Vassil Iotzov  
915 programmed the experiment with input from Anne Saulin and performed the research; Vassil  
916 Iotzov and Anne Saulin analyzed the data with input from Grit Hein, Jochen Kaiser and Shihui  
917 Han; Grit Hein and Vassil Iotzov wrote the paper with input from Anne Saulin, Jochen Kaiser  
918 and Shihui Han.

#### 919 **Author Affiliations**

920 Vassil Iotzov, Translational Social Neuroscience Lab, Department of Psychiatry, Psychosomatic  
921 and Psychotherapy, University Hospital of Wuerzburg, Margarete-Höppel-Platz 1, 97080  
922 Würzburg / Germany, Tel.: +49 931 201 77 412, E-mail: [Iotzov\\_V@ukw.de](mailto:Iotzov_V@ukw.de)



923 Anne Saulin, Translational Social Neuroscience Lab, Department of Psychiatry, Psychosomatic  
924 and Psychotherapy, University Hospital of Wuerzburg, Margarete-Höppel-Platz 1, 97080  
925 Würzburg / Germany, Tel.: +49 931 201 77 412, E-mail: [Saulin\\_A@ukw.de](mailto:Saulin_A@ukw.de)

926 Prof. Dr. Jochen Kaiser, Institute of Medical Psychology, Goethe-Universität, Heinrich-  
927 Hoffmann-Str. 10, Building 93A, Room A45, 60528 Frankfurt am Main, Tel.: 069-6301 6302, E-  
928 mail: [J.Kaiser@med.uni-frankfurt.de](mailto:J.Kaiser@med.uni-frankfurt.de)

929 Prof. Dr. Shihui Han, Culture and Social Cognitive Neuroscience Lab, School of Psychological  
930 and Cognitive Sciences, PKU-IDG/McGovern Institute for Brain Research, Peking University,  
931 Room 1614, Wang Kezhen Building, No. 52, Haidian Road, Haidian District, Beijing 100080,  
932 People's Republic of China, Tel: (86) 10-6275-9138, E-mail: [shan@pku.edu.cn](mailto:shan@pku.edu.cn)

933 Prof. Dr. Grit Hein, Translational Social Neuroscience Lab, Department of Psychiatry,  
934 Psychosomatic and Psychotherapy, University Hospital of Wuerzburg, Margarete-Höppel-Platz  
935 1, 97080 Würzburg / Germany, Tel.: +49 931 201 77 411, E-mail: [Hein\\_G@ukw.de](mailto:Hein_G@ukw.de)

936 **Competing interests**

937 The authors declare no competing interests.
